# Supplementary material for: MDM2-Mediated p21 Proteasomal Degradation Promotes Fluoride Toxicity in Ameloblasts
Source: MDPI journal article supplement (doi:10.3390/cells8050436), 2019-05-10
Supplement: s1 [file s1]

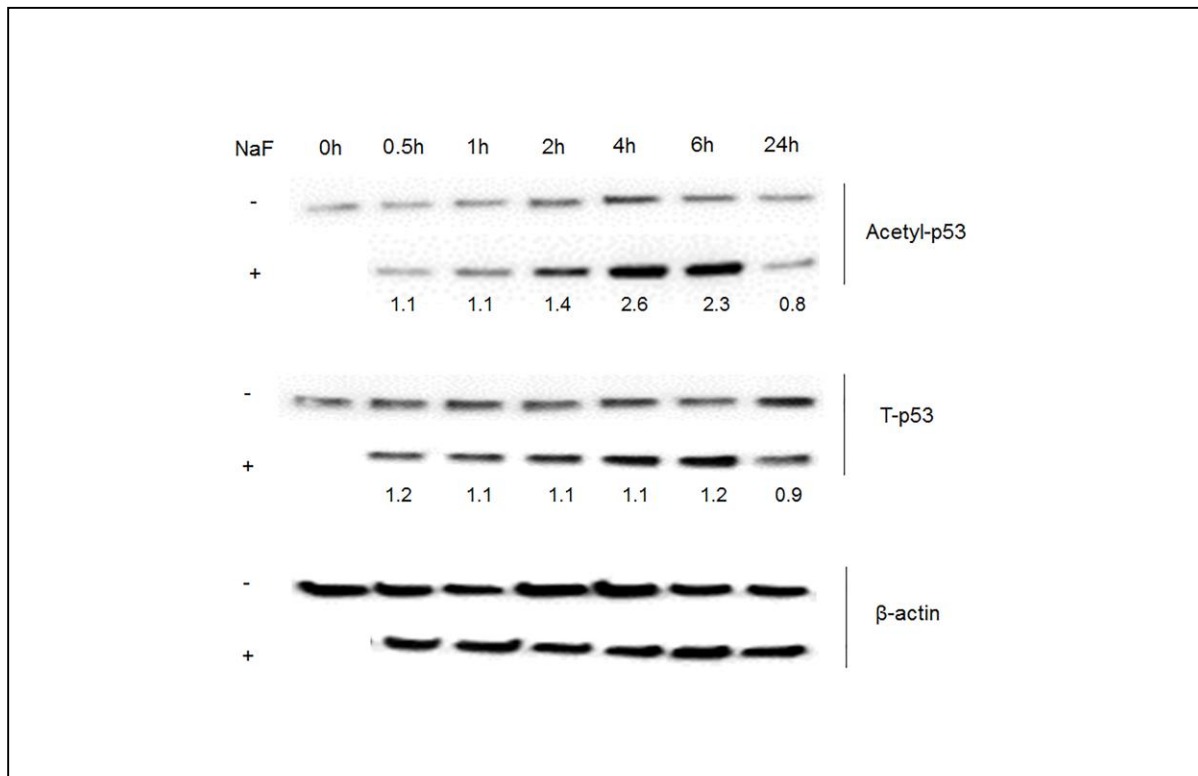

**Supplementary Fig. S1.** Fluoride induced formation of acetylated p53 (Ac-p53) in LS8 cells. LS8 cells were treated with NaF (5 mM) for 0-24 h. Ac-p53 (53 kDa) and total p53 (53 kDa) expression were detected by western blot. NaF treatment (+) increased Ac-p53 within 2-6 h. Fluoride treatment did not affect total p53 (T-p53) protein levels. The numbers show relative expression with NaF (+) versus without NaF (-) at each time point normalized by the loading control β-actin (44 kDa).

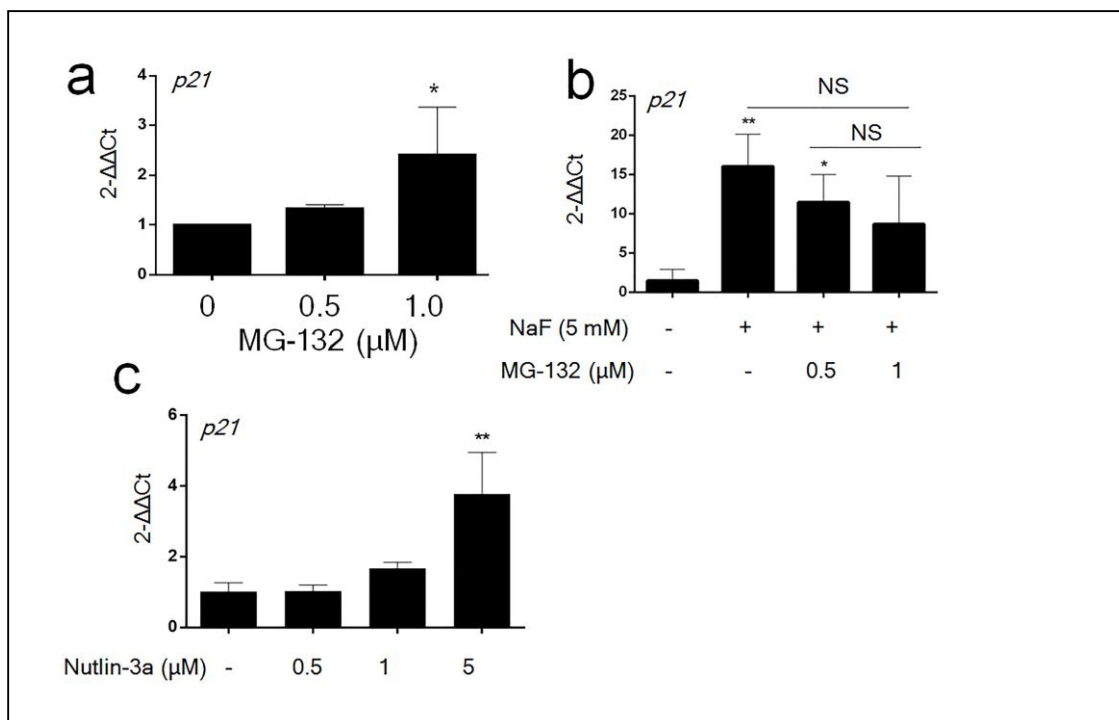

**Supplementary Fig. S2.** Effect of Nutlin-3a and MG-132 on *p21* mRNA expression in LS8 cells. LS8 cells were treated with (a) MG-132, (b) NaF and MG-132, (c) Nutlin-3a at the indicated concentrations for 24 h. *p21* mRNA was quantified by real-time qPCR. (a) MG-132 (1 μM) significantly increased *p21*

mRNA. (b) MG-132 did not alter fluoride-mediated *p21* mRNA expression. (c) Nutlin-3a (5  $\mu$ M) significantly increased *p21* mRNA levels. Data are presented as means  $\pm$  SD (\* $P$  < 0.05 or \*\* $P$  < 0.01 vs Control).

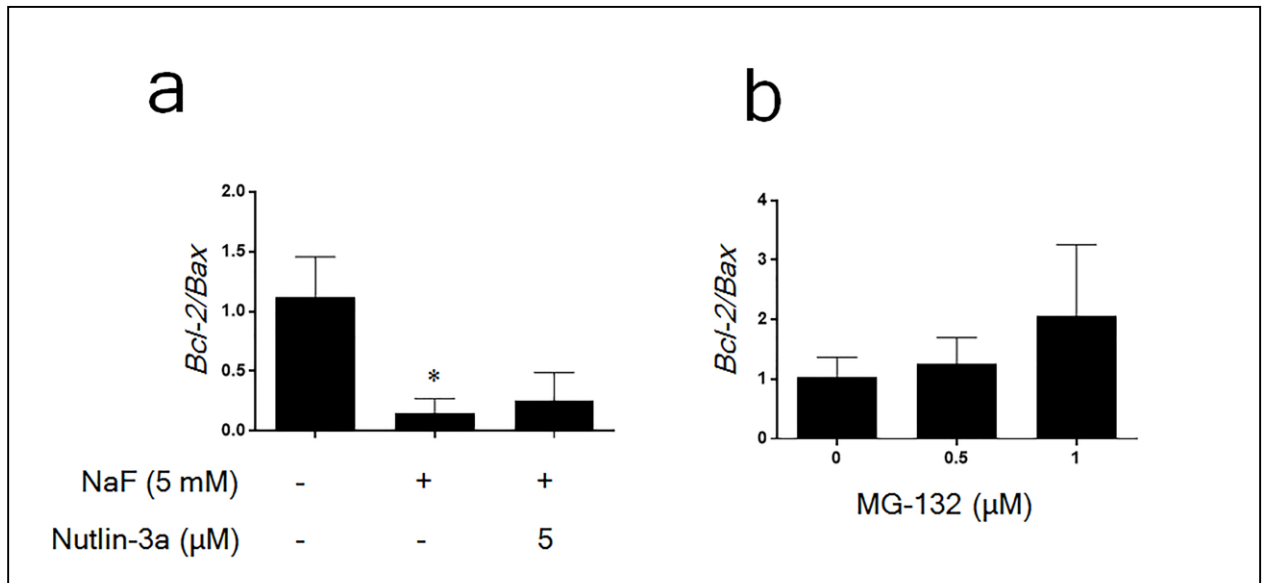

**Supplementary Fig. S3. Effect of Nutlin-3a and MG-132 on *Bcl2/Bax* mRNA ratios in LS8 cells.** LS8 cells were treated with (a) NaF (5 mM) with/without Nutlin-3a (5  $\mu$ M) or (b) MG-132 (0.5-1.0  $\mu$ M) for 24 h. The *Bcl-2/Bax* mRNA ratio was quantified by q-PCR. (a) NaF significantly decreased the *Bcl-2/Bax* mRNA ratio and this was not altered by Nutlin-3a treatment. (b) MG-132 treatment did not significantly increase the *Bcl-2/Bax* mRNA ratio. Data are presented as means  $\pm$  SD. (\* $P$  < 0.05 vs Control).

Figure 1c (Western blot)

Supplementary 4

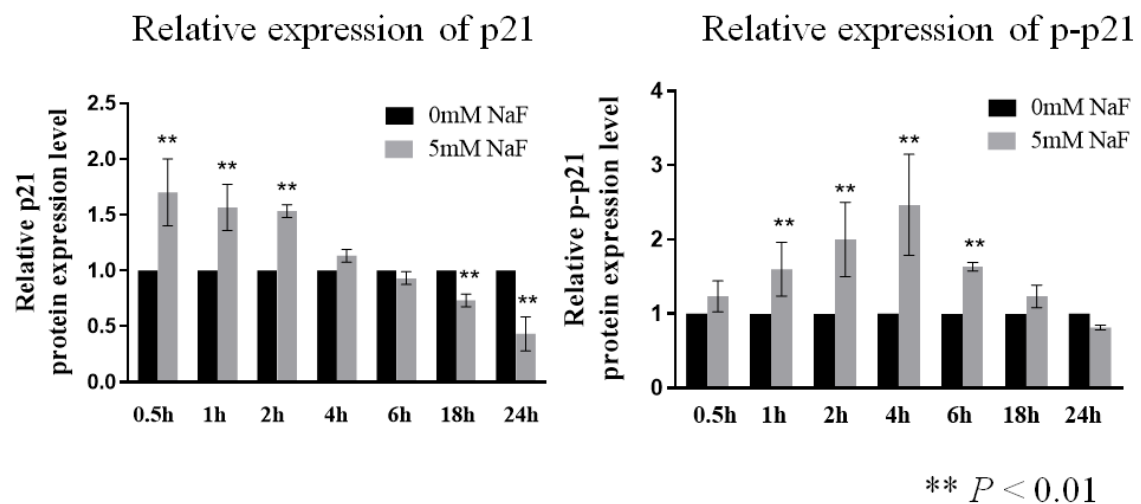

**Supplementary Fig. S4. Statistical analysis of relative expression of p21 and p-p21 in LS8 cells.** LS8 cells were treated with NaF (5 mM) for the indicated times and p21 (18 kDa) and p-p21 (21 kDa) were

detected by western blots. Protein expression was normalized by use of the loading control protein ( $\beta$ -actin). Relative protein expression and statistical significance were analyzed. Data are presented as means  $\pm$  SD. (\* $P$  < 0.05, \*\* $P$  < 0.01 vs 0 mM NaF).

Figure 2b (Western blot)

Supplementary 5

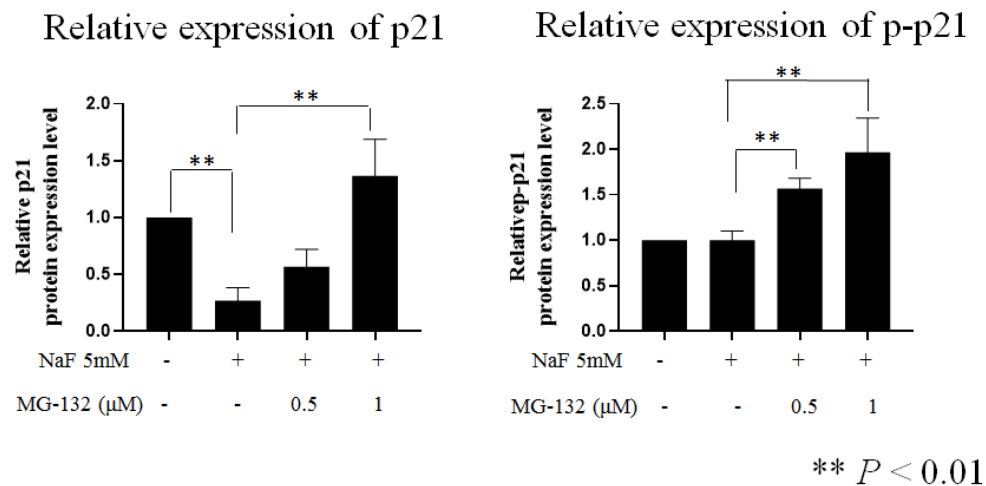

**Supplementary Fig. S5. Statistical analysis of relative expression of p21 and p-p21 in LS8 cells.** LS8 cells were treated with MG-132 (0.5-1.0  $\mu$ M) for 2 h prior to NaF (5 mM) treatment for 24 h. p21 (18 kDa) and p-p21 (21 kDa) were detected by western blot. Protein expression was normalized by use of the loading control protein ( $\beta$ -actin). Relative protein expression and statistical significance were analyzed. Data are presented as means  $\pm$  SD. (\*\* $P$  < 0.01).

Figure 3c (Western blot)

Supplementary6

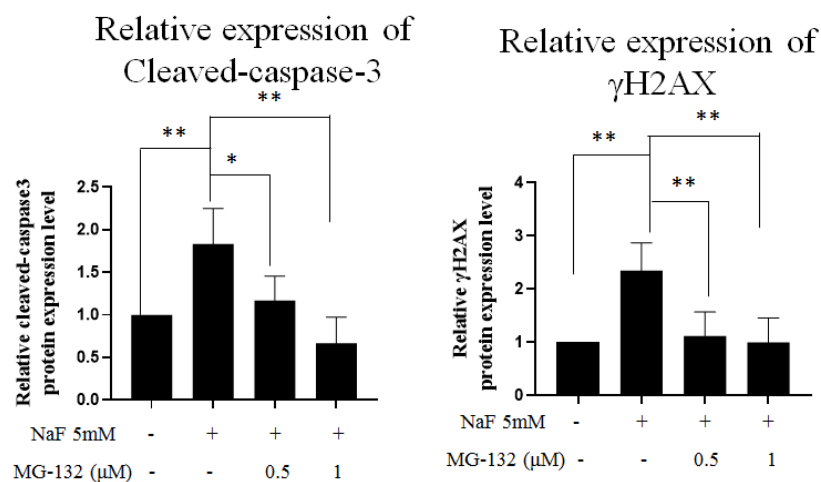

**Supplementary Fig. S6. Statistical analysis of relative expression of Cleaved-caspase-3 and  $\gamma$ H2AX in LS8 cells.** LS8 cells were treated with MG-132 (0.5-1.0  $\mu$ M) for 2 h prior to NaF (5 mM) treatment for 24 h.  $\gamma$ H2AX (15 kDa) and cleaved-caspase-3 (17 kDa) were detected by western blots. Protein expression was normalized by use of the loading control protein ( $\beta$ -actin). Relative protein expression and statistical significance were analyzed. Data are presented as means  $\pm$  SD. (\* $P$  < 0.05, \*\* $P$  < 0.01).

Figure 4b (Western blot)

Supplementary 7

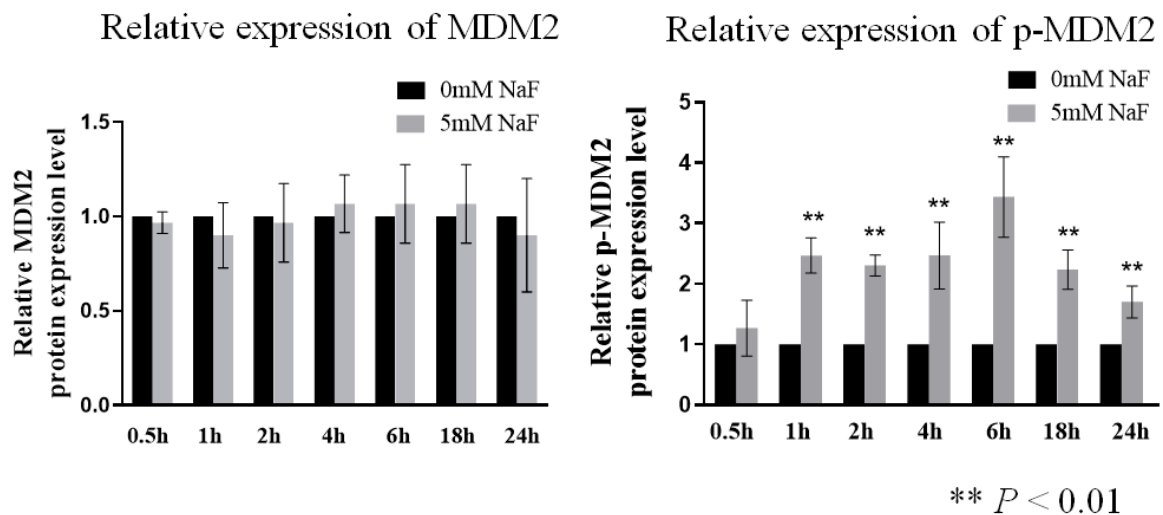

**Supplementary Fig. S7. Statistical analysis of relative expression of MDM2 and p-MDM2 in LS8 cells.** Cells were treated with NaF (5 mM) for the indicated times. Whole cell lysates were subjected to western blot analysis for phospho-MDM2 (p-MDM2 [Ser166]) (90 kDa) and total MDM2 (MDM2) (90 kDa) expression. Protein expression was normalized by use of the loading control protein ( $\beta$ -actin). Relative protein expression and statistical significance were analyzed. Data are presented as means  $\pm$  SD. \*\* $P$  < 0.01 vs 0mM NaF).

Figure 7b (Western blot)

Supplementary 8

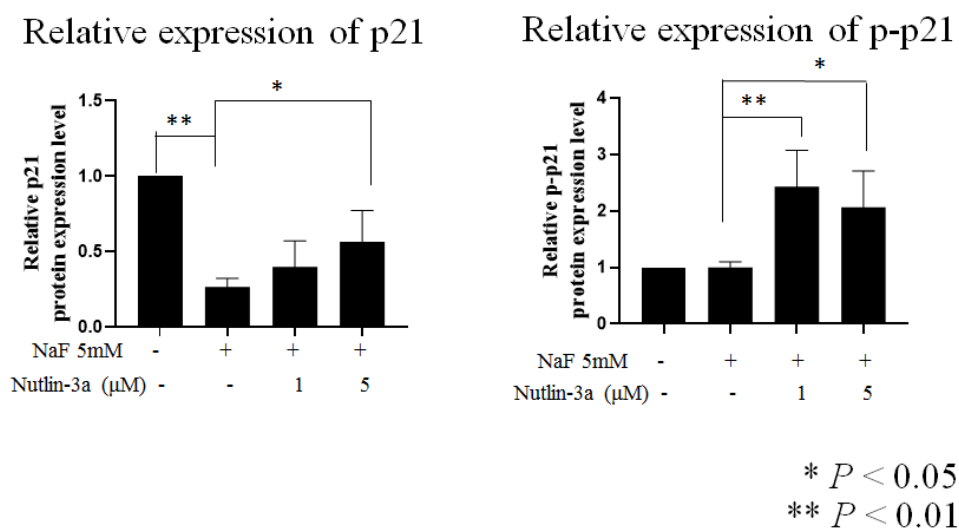

**Supplementary Fig. S8. Statistical analysis of relative expression of p21 and p-p21 in LS8 cells.** LS8 cells were treated with Nutlin-3a (1-5 μM) for 2 h followed by the additional NaF (5 mM) for 24 h. p21 (18 kDa) and p-p21 (21 kDa) were detected by western blots. Protein expression was normalized by use of the loading control protein (β-actin). Relative protein expression and statistical significance were analyzed. Data are presented as means ± SD. (\* $P < 0.05$ , \*\* $P < 0.01$ ).

Figure 8 (Western blot)

Supplementary 9

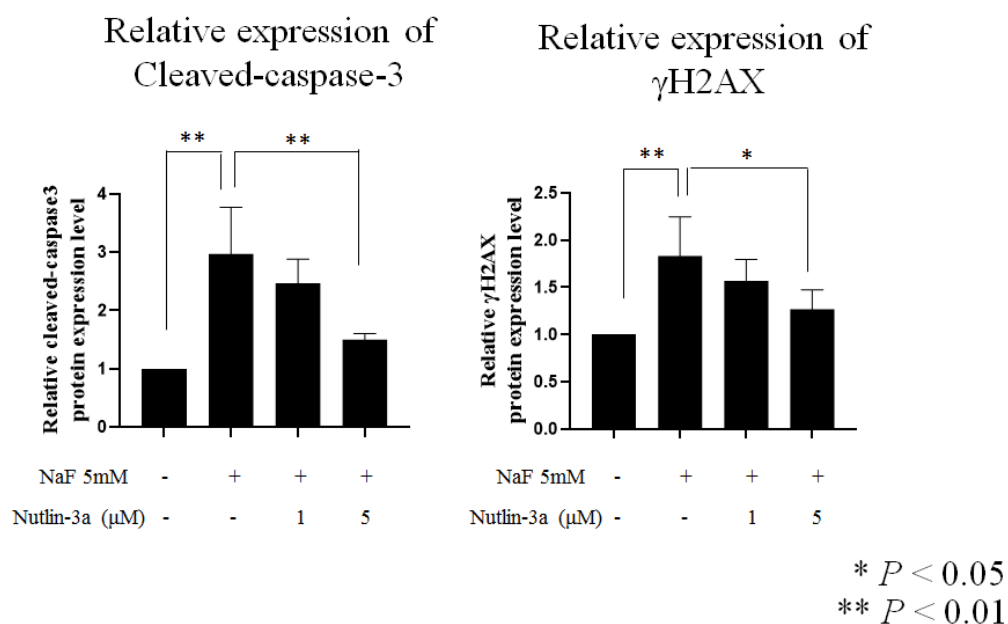

**Supplementary Fig. S9. Statistical analysis of relative expression of cleaved-caspase-3 and γH2AX in LS8 cells.** LS8 cells were treated with Nutlin-3a (1 μM or 5 μM) for 2 h followed by the addition of

NaF (5 mM) for 24 h. DNA damage marker  $\gamma$ H2AX (15 kDa) expression and caspase-3 cleavage (17 kDa) were detected by western blot. Protein expression was normalized by use of the loading control protein ( $\beta$ -actin). Relative protein expression and statistical significance were analyzed. Data are presented as means  $\pm$  SD. (\* $P$  < 0.05, \*\* $P$  < 0.01).

**Table S1.** Primers used for quantitative Real-time PCR.

| Gene         | GenBank ID # | 5' Primer               | 3' Primer              |
|--------------|--------------|-------------------------|------------------------|
| <i>p21</i>   | NM_007669.5  | AATTGGAGTCAGGCGCAGAT    | CGAAGAGACAACGGCACACT   |
| <i>Mdm2</i>  | NM_010786.4  | GTCTGTGTCTACCGAGGGTG    | TAAGTGTCGTTTTGCGCTCC   |
| <i>Bax</i>   | NM_007527.3  | AGCTGCCACCCGGAAGAAGACCT | CCGGCGAATTGGAGATGAACTG |
| <i>Bcl-2</i> | NM_009741.5  | TGGATGACTGAGTACCTGAACC  | GCCAGGAGAAATCAAACAGAGG |
| <i>Gapdh</i> | NM_001289726 | GCAAAGTGGAGATTGTTGCCAT  | CCTTGACTGTGCCGTTGAATTT |
